# Supplementary material for: Perfluorooctanoic acid in indoor particulate matter triggers oxidative stress and inflammation in corneal and retinal cells
Source: PubMed Central journal article supplement (PMC7518444; doi:10.1038/s41598-020-72600-8), 2020-09-24

**Perfluorooctanoic acid in indoor particulate matter triggers oxidative stress and inflammation in corneal and retinal cells**

Peng-Tai Tien, Hui-Ju Lin, Yi-Yu Tsai, Yun-Ping Lim, Chih Sheng Chen, Ching-Yao

Chang, Chao-Jen Lin, Jamie Jiin-Yi Chen, Shan-Mei Wu, Yuh-Jeen Huang, Lei Wan

Supplement table 1: Quality Assurance for PFCs analysis with GC-MS

| Peak Name                                   | 8:2FTOH     | 10:2FTOH     | PFOA         |
|---------------------------------------------|-------------|--------------|--------------|
| Instrument detection limits (ng/mL)         | 8.31        | 9.51         | 549.00       |
| Method detection limits (ng/mL)             | 9.73        | 13.73        | 674.17       |
| Coefficients of calibration curve ( $R^2$ ) | 0.9997      | 0.9996       | 0.9994       |
| Recovery% (RSD)                             | 90.25(6.21) | 93.26 (7.06) | 90.73 (9.58) |

Supplement table 2. Weight distribution of different indoor dusts.

| Location   | Total    | <u>Weight (mg: %)</u> |                      |                     |                  |
|------------|----------|-----------------------|----------------------|---------------------|------------------|
|            |          | >PM <sub>10</sub>     | PM <sub>10-2.5</sub> | PM <sub>2.5-1</sub> | <PM <sub>1</sub> |
| Library#1  | 4443.94  | 4135.8 (93.07)        | 296.7 (6.68)         | 11.01 (0.25)        | 0.36 (0.01)      |
| Library#2  | 6635.97  | 6212.3 (93.62)        | 368.9 (5.56)         | 53.5 (0.81)         | 1.35 (0.02)      |
| Decoration | 5896.79  | 5348.3 (90.70)        | 432.5 (7.33)         | 111.9 (1.90)        | 4.05 (0.07)      |
| Office     | 14315.57 | 13279.2 (92.76)       | 852.2 (5.95)         | 173.9 (1.21)        | 10.31 (0.07)     |
| House      | 9955.09  | 9538.1 (95.81)        | 362.0 (3.64)         | 52.4 (0.53)         | 2.55 (0.03)      |

\* Percentage(%) =  $\frac{\text{weight(mg)}}{\text{total weight(mg)}} \times 100\%$

Supplementary table 3. Concentrations of perfluorinated compounds for each particle and surface area.

| <b>Particle size/<br/>concentration</b> | <b>ng/g</b> | <b>fg/particle</b> | <b>fg/<math>\mu\text{m}^2</math></b> |
|-----------------------------------------|-------------|--------------------|--------------------------------------|
| <b>8:2 FTOH</b>                         |             |                    |                                      |
| <b>10 ~ 50</b>                          | 2763        | 0.0781             | 0.0000276                            |
| <b>2.5 ~ 10</b>                         | 14542       | 0.0036             | 0.0000308                            |
| <b>1 ~ 2.5</b>                          | 24796       | 0.0002             | 0.0000189                            |
| <b>10:2 FTOH</b>                        |             |                    |                                      |
| <b>10 ~ 50</b>                          | 2763        | 0.0281             | 0.000009950                          |
| <b>2.5 ~ 10</b>                         | 14542       | 0.0015             | 0.000013264                          |
| <b>1 ~ 2.5</b>                          | 24796       | 0.0001             | 0.000008001                          |
| <b>PFOA</b>                             |             |                    |                                      |
| <b>10 ~ 50</b>                          | 2763        | 0.0656             | 0.0000232                            |
| <b>2.5 ~ 10</b>                         | 14542       | 0.0042             | 0.0000362                            |
| <b>1 ~ 2.5</b>                          | 24796       | 0.0003             | 0.0000205                            |

Supplementary table 4. Concentrations of perfluorinated compounds among different indoor PM<sub>2.5-1</sub> particulates

| Location   | Concentration (ng/g), RSD (%) |     |                  |     |             |     |
|------------|-------------------------------|-----|------------------|-----|-------------|-----|
|            | <u>8:2 FTOH</u>               |     | <u>10:2 FTOH</u> |     | <u>PFOA</u> |     |
| Library#1  | 24796                         | 3.2 | 10515            | 5.5 | 26882       | 3.9 |
| Library#2  | ND                            |     | ND               |     | 19304       | 8.8 |
| Decoration | ND                            |     | ND               |     | 12752       | 8.3 |
| Office     | ND                            |     | ND               |     | 15716       | 5.4 |
| House      | ND                            |     | ND               |     | 17453       | 8.2 |

RSD: relative standard deviation

ND: not detectable

Supplementary table 5. Concentration change rate of perfluorinated compounds in carpet (ng g<sup>-1</sup>/h) during accelerated aging

| Compound  | Concentration change rate of carpet (ng g <sup>-1</sup> /hr) |              |              |
|-----------|--------------------------------------------------------------|--------------|--------------|
|           | <u>12 hr</u>                                                 | <u>24 hr</u> | <u>72 hr</u> |
| 8:2 FTOH  | 402.3                                                        | 497.0        | 238.2        |
| 10:2 FTOH | 166.0                                                        | 260.3        | 125.3        |
| PFOA      | 402.6                                                        | 742.3        | 314.8        |

Supplementary table 6. Concentration change rate of perfluorinated compounds in carpet (ng g<sup>-1</sup>/h) during carpet cleaning

| Compound  | Concentration change rate of carpet (ng g <sup>-1</sup> /hr) |              |              |
|-----------|--------------------------------------------------------------|--------------|--------------|
|           | <u>12 hr</u>                                                 | <u>24 hr</u> | <u>72 hr</u> |
| 8:2 FTOH  | 2775.7                                                       | 1457.3       | 1012.0       |
| 10:2 FTOH | 1262.5                                                       | 744.9        | 628.3        |
| PFOA      | 3538.9                                                       | 2111.7       | 1980.7       |

# Claudin-1

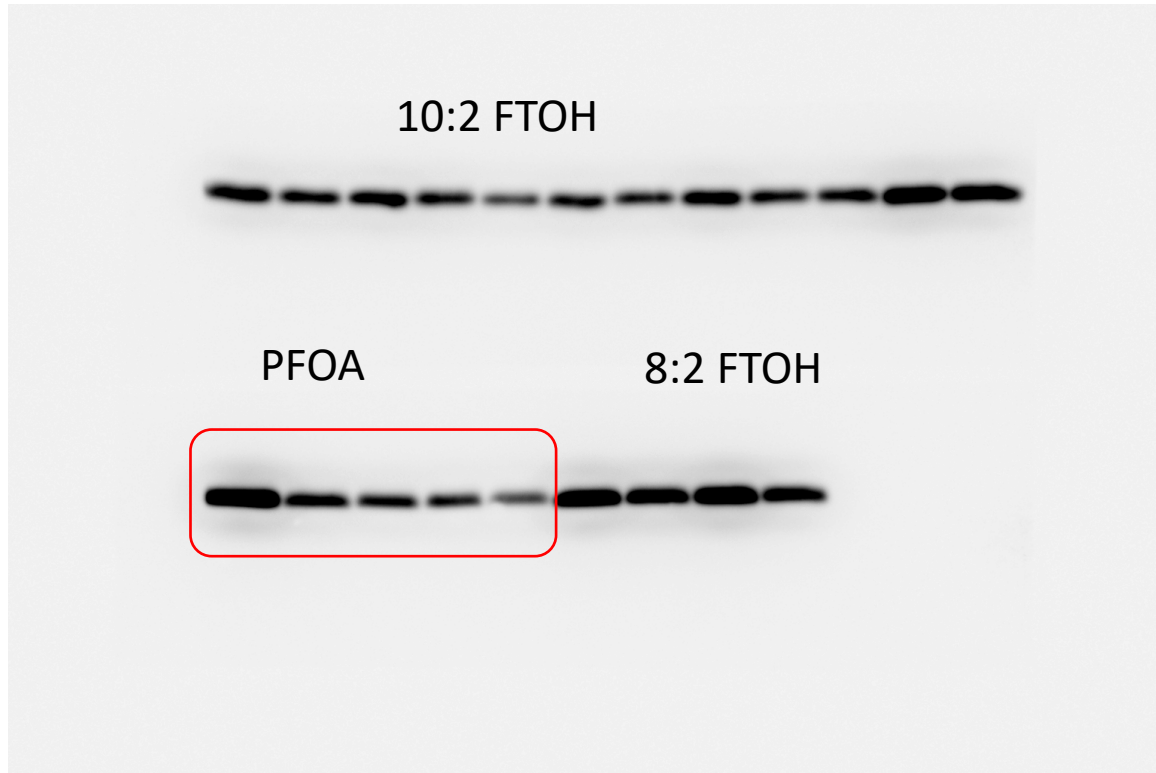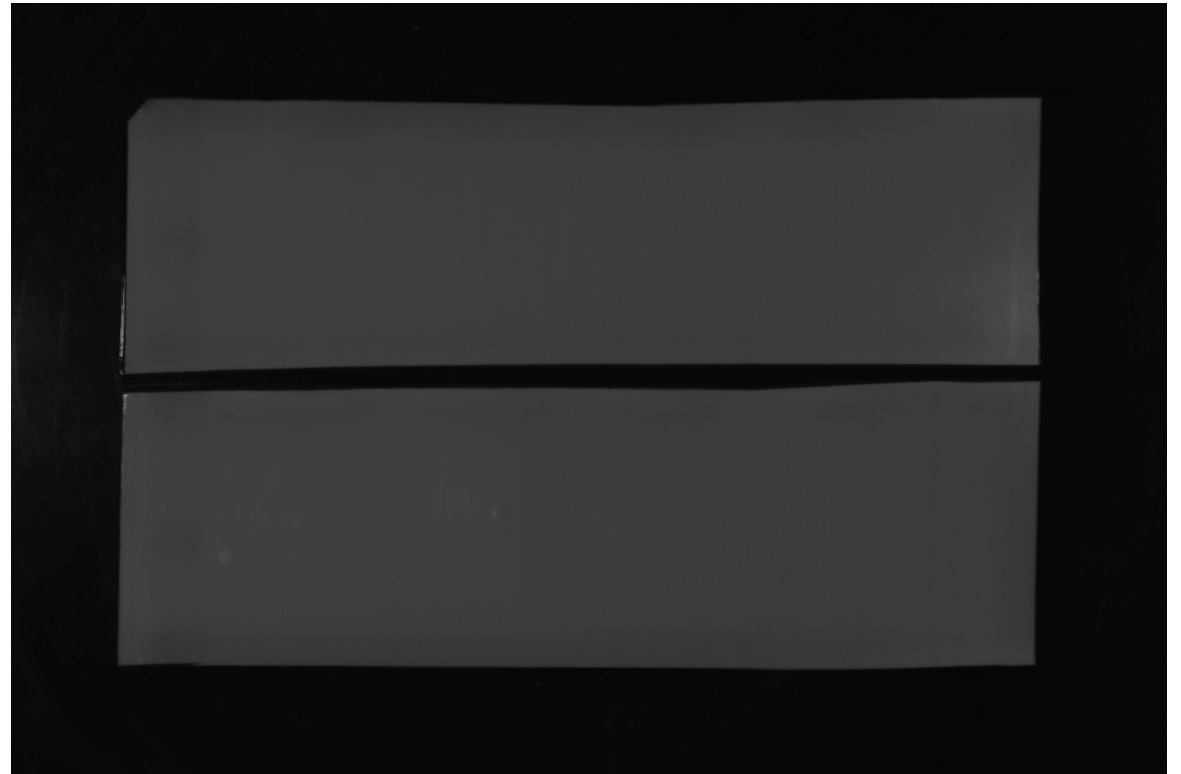



# $\beta$ -actin

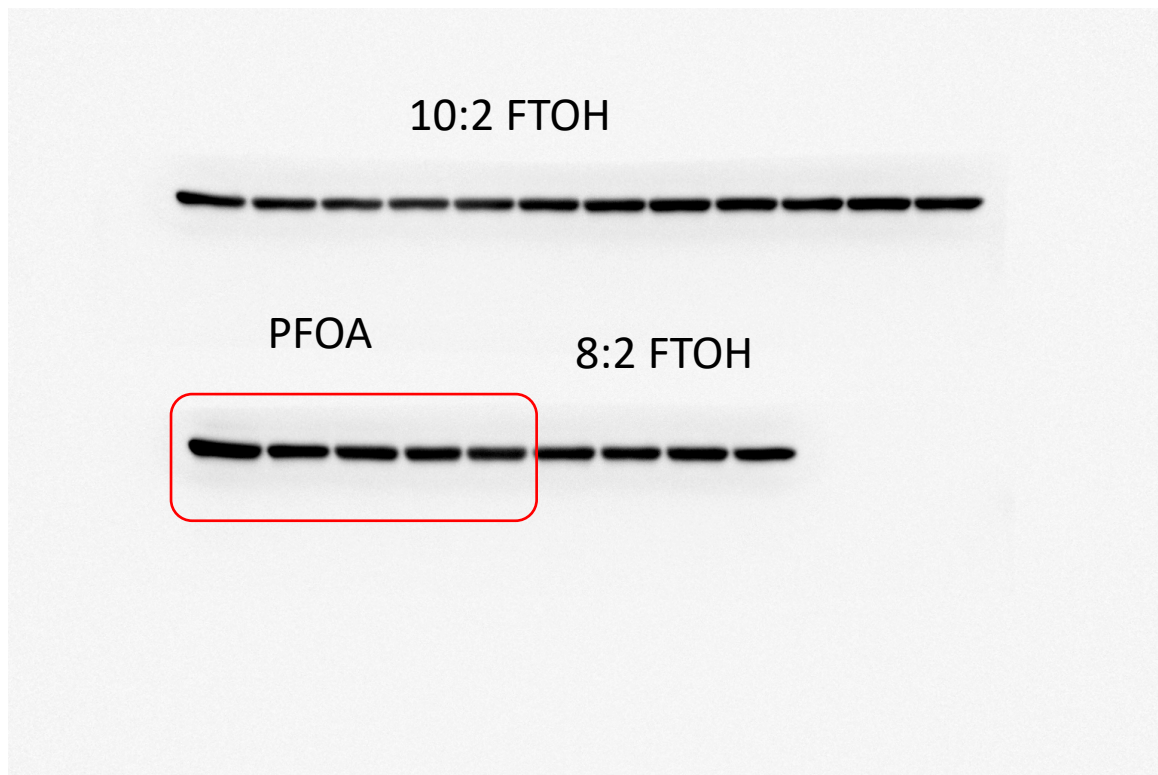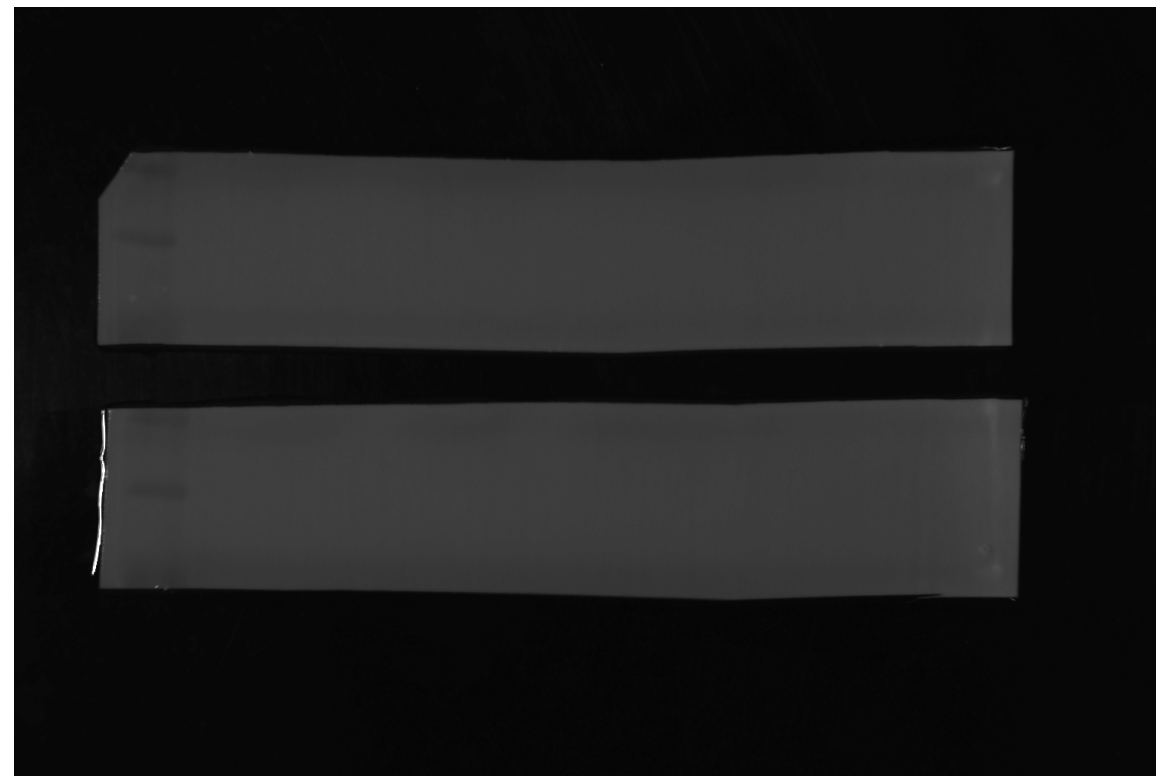

Supplement: 41598_2020_72600_MOESM1_ESM.pdf [file 41598_2020_72600_MOESM1_ESM.pdf]
